# Supplementary material
Source: PubMed Central journal article supplement (PMC2705946)

Type of file: figure

Label: Figure S1

Filename: NM08010303B\_Figure\_S1.pdf

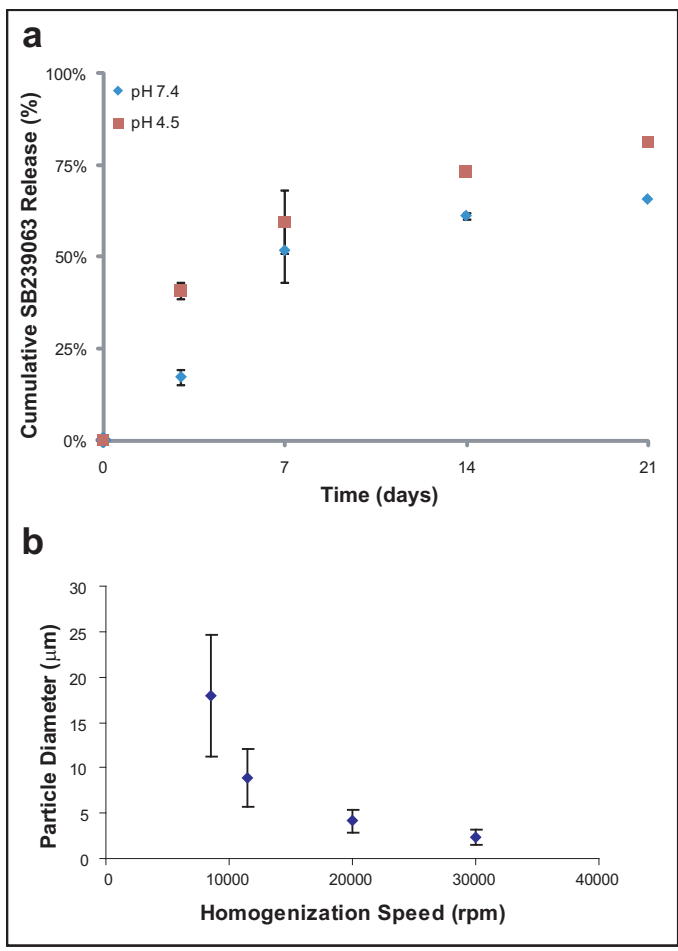

Type of file: figure

Label: Figure S2

Filename: NM08010303B\_Figure\_S2.pdf

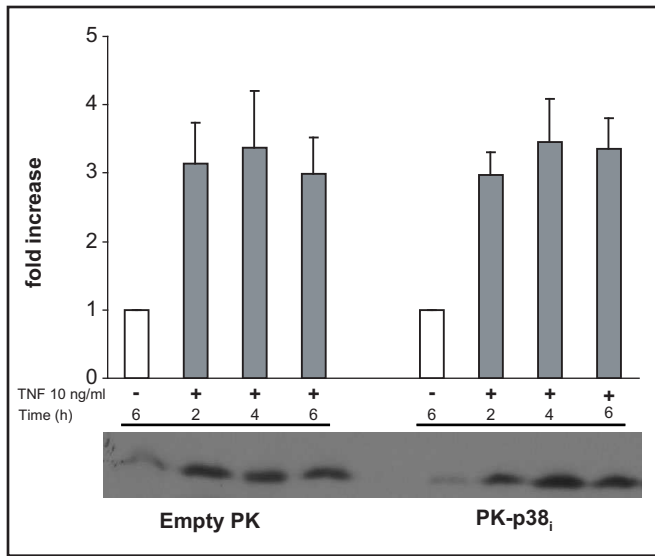

Type of file: figure

Label: Figure S3

Filename: NM08010303B\_Figure\_S3.pdf

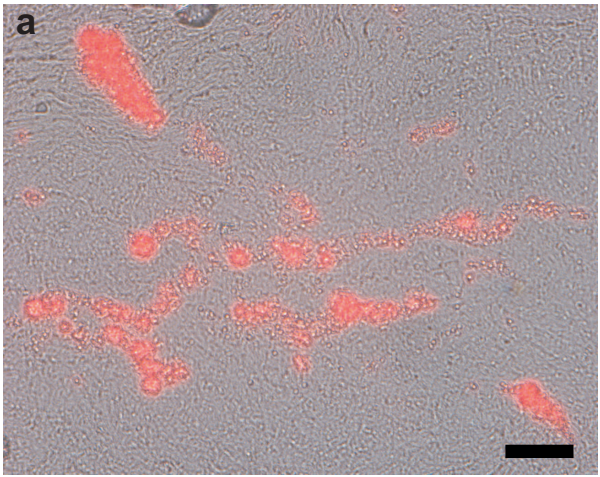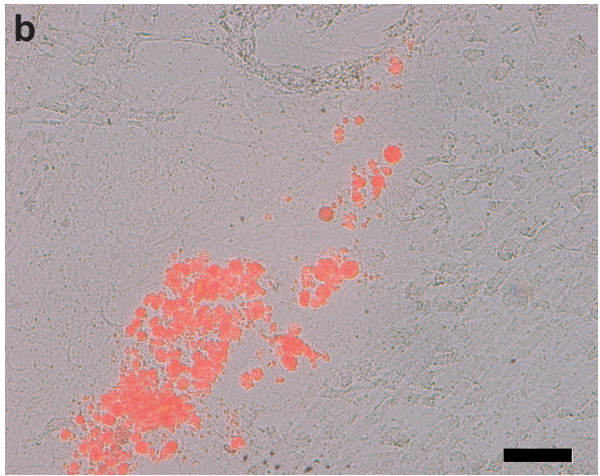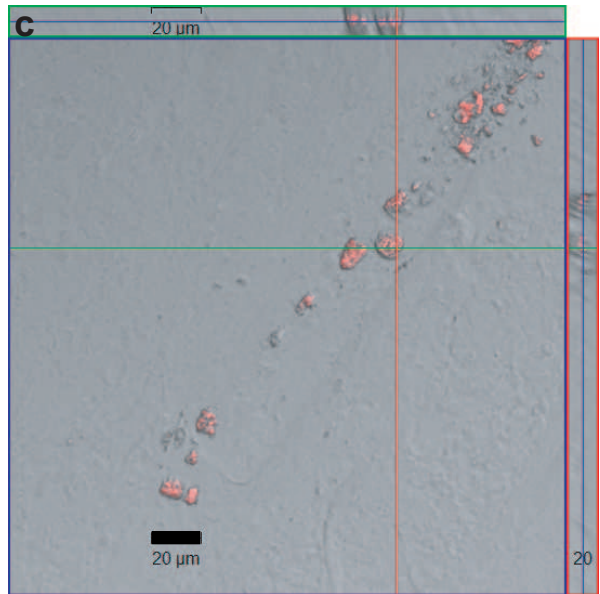

Type of file: figure

Label: Figure S4

Filename: NM08010303B\_Figure\_S4.pdf

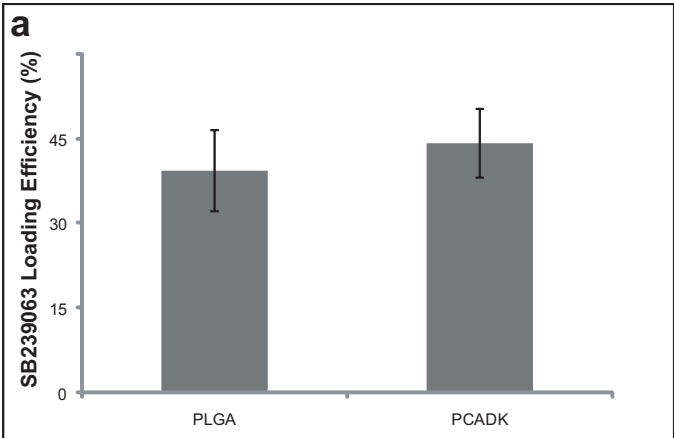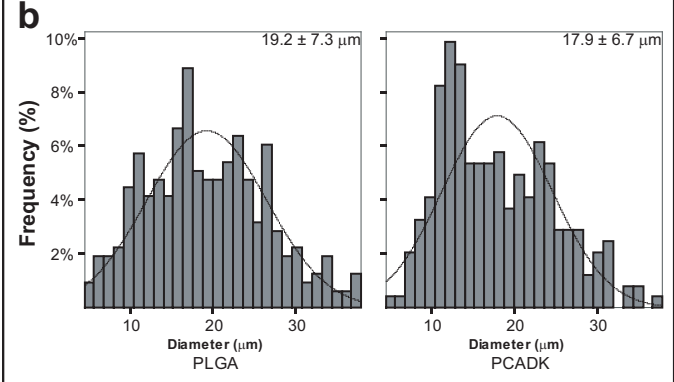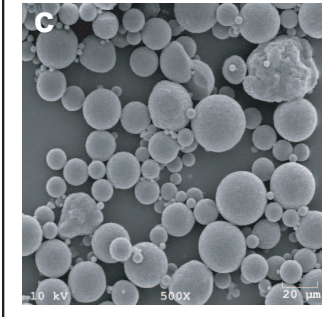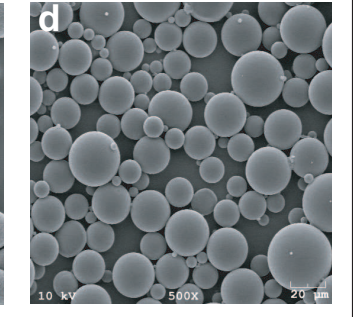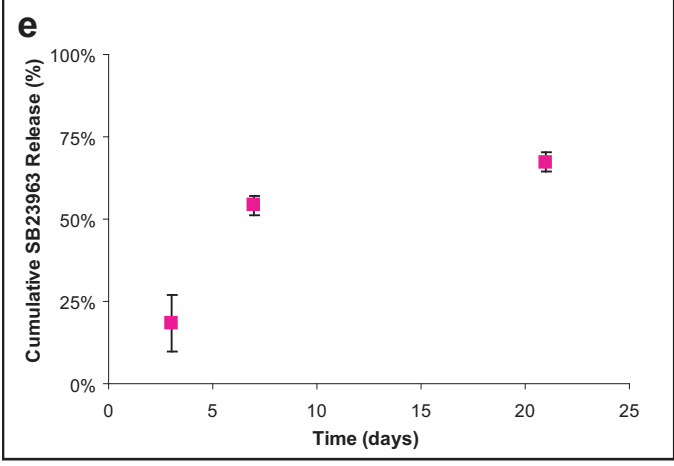

Supplement: NIHMS117733-supplement-01.pdf [file NIHMS117733-supplement-01.pdf]
